# Supplementary figures and images for: Synthesis, In Vitro and In Silico Analysis of New Oleanolic Acid and Lupeol Derivatives against Leukemia Cell Lines: Involvement of the NF-κB Pathway
Source: MDPI journal article supplement (doi:10.3390/ijms23126594), 2022-06-13

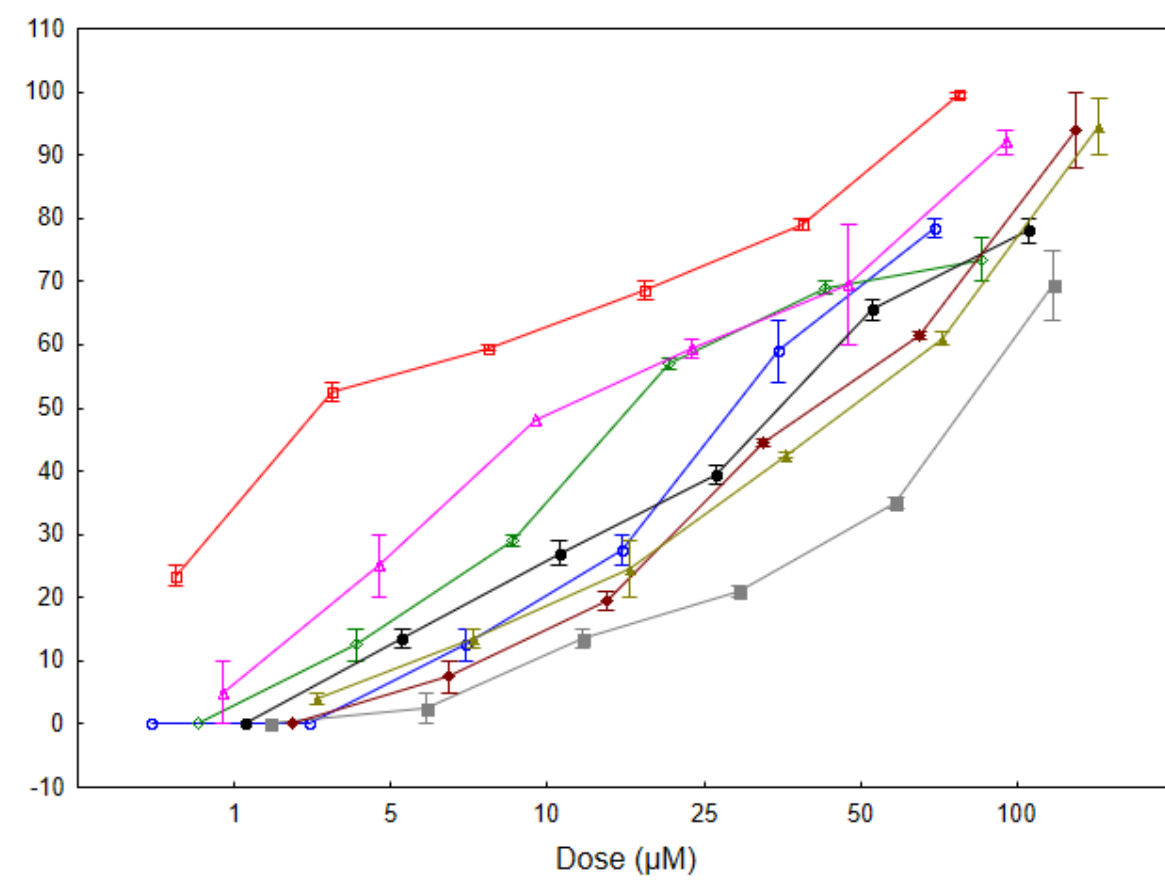

— 2  
 — 4  
 — 3  
 — 8  
 — 7  
 — 5  
 — 1  
 — 6

**Figure S1.** HL60 cells

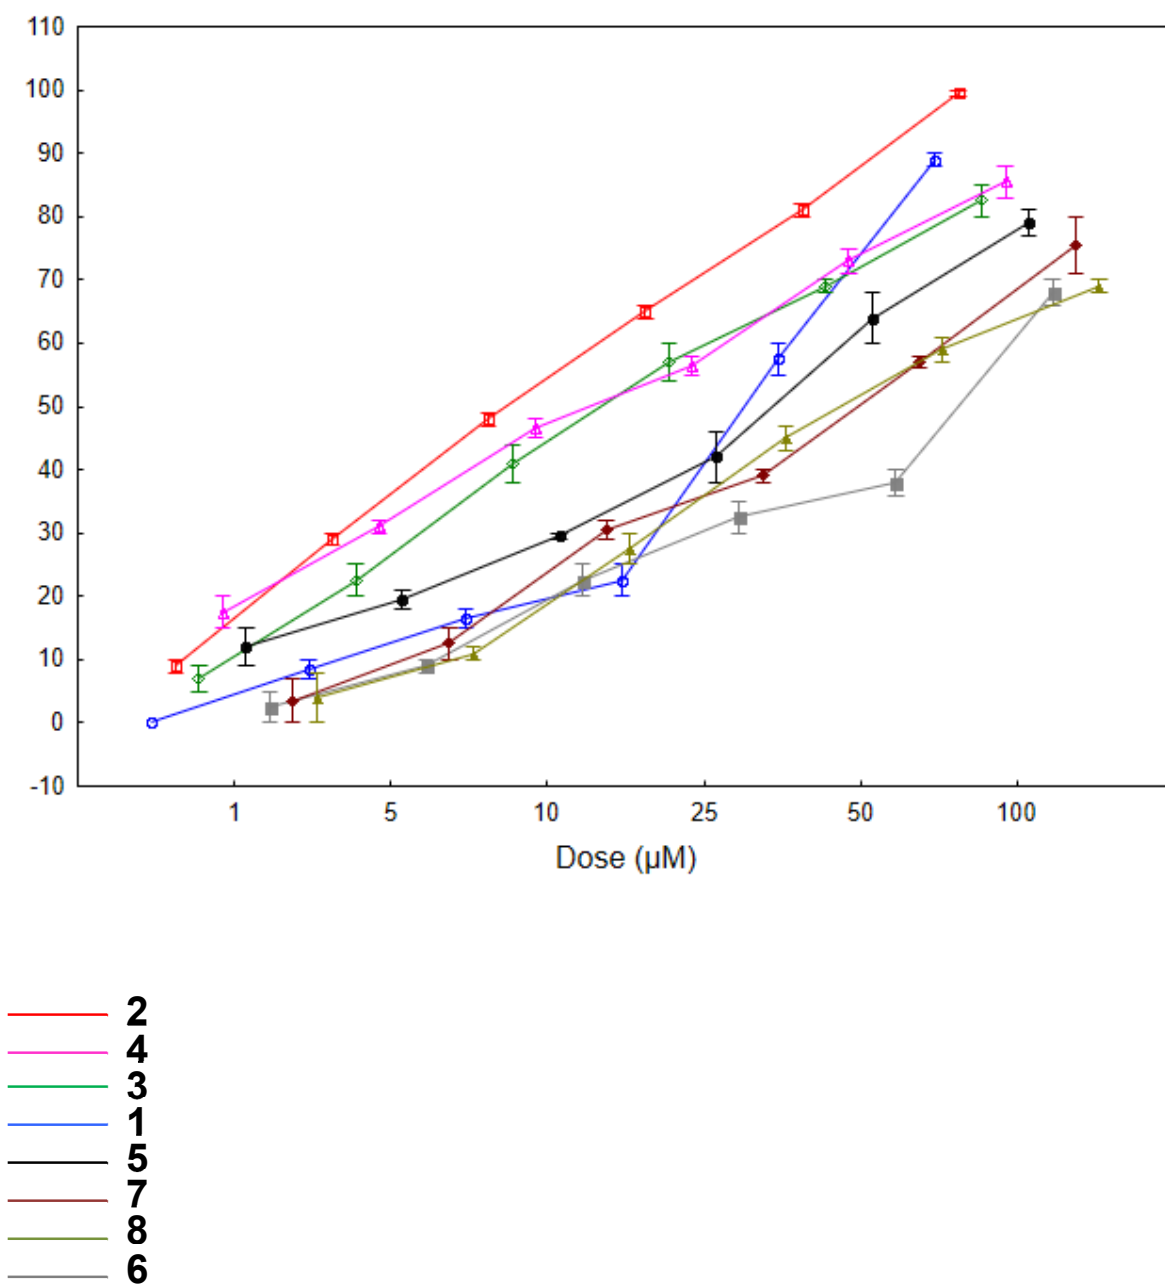

**Figure S2.** HL60R cells

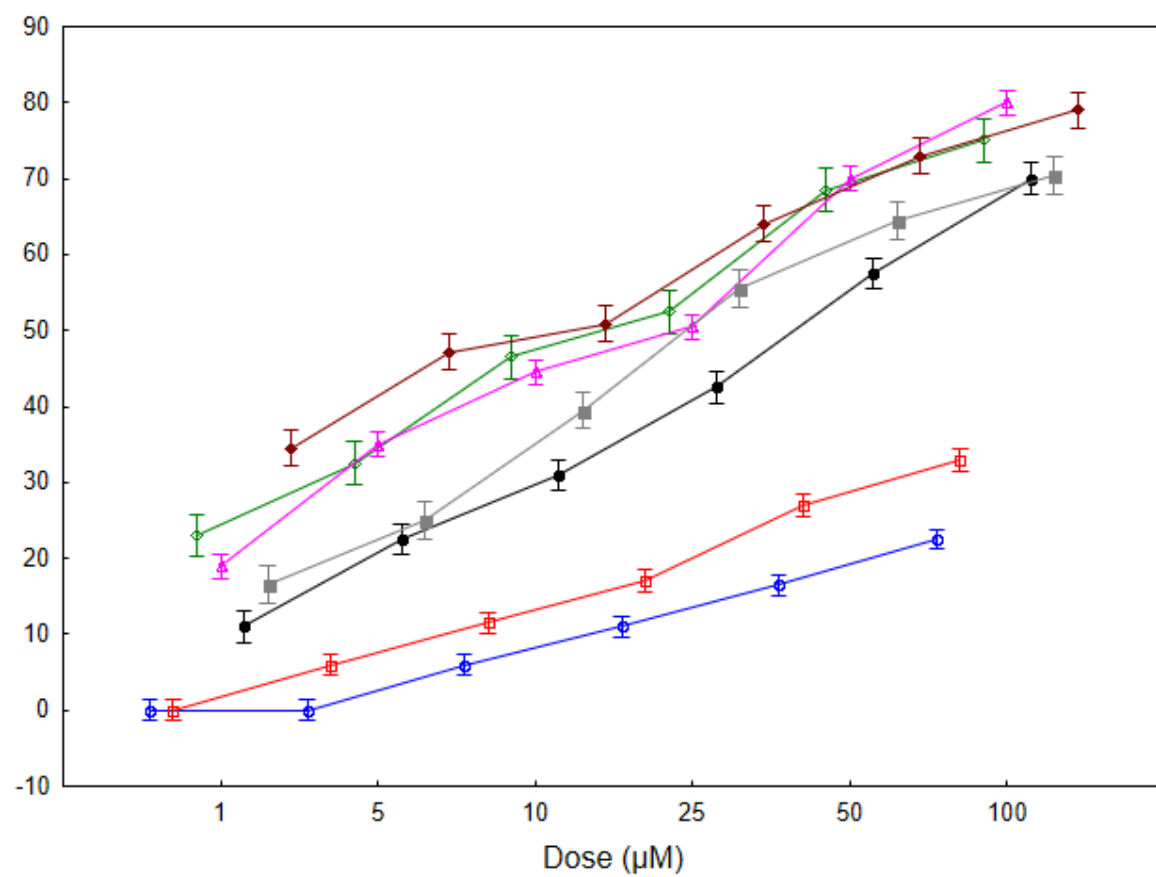

10  
 14  
 11  
 9  
 13  
 15  
 12

**Figure S3.** HL60 cells

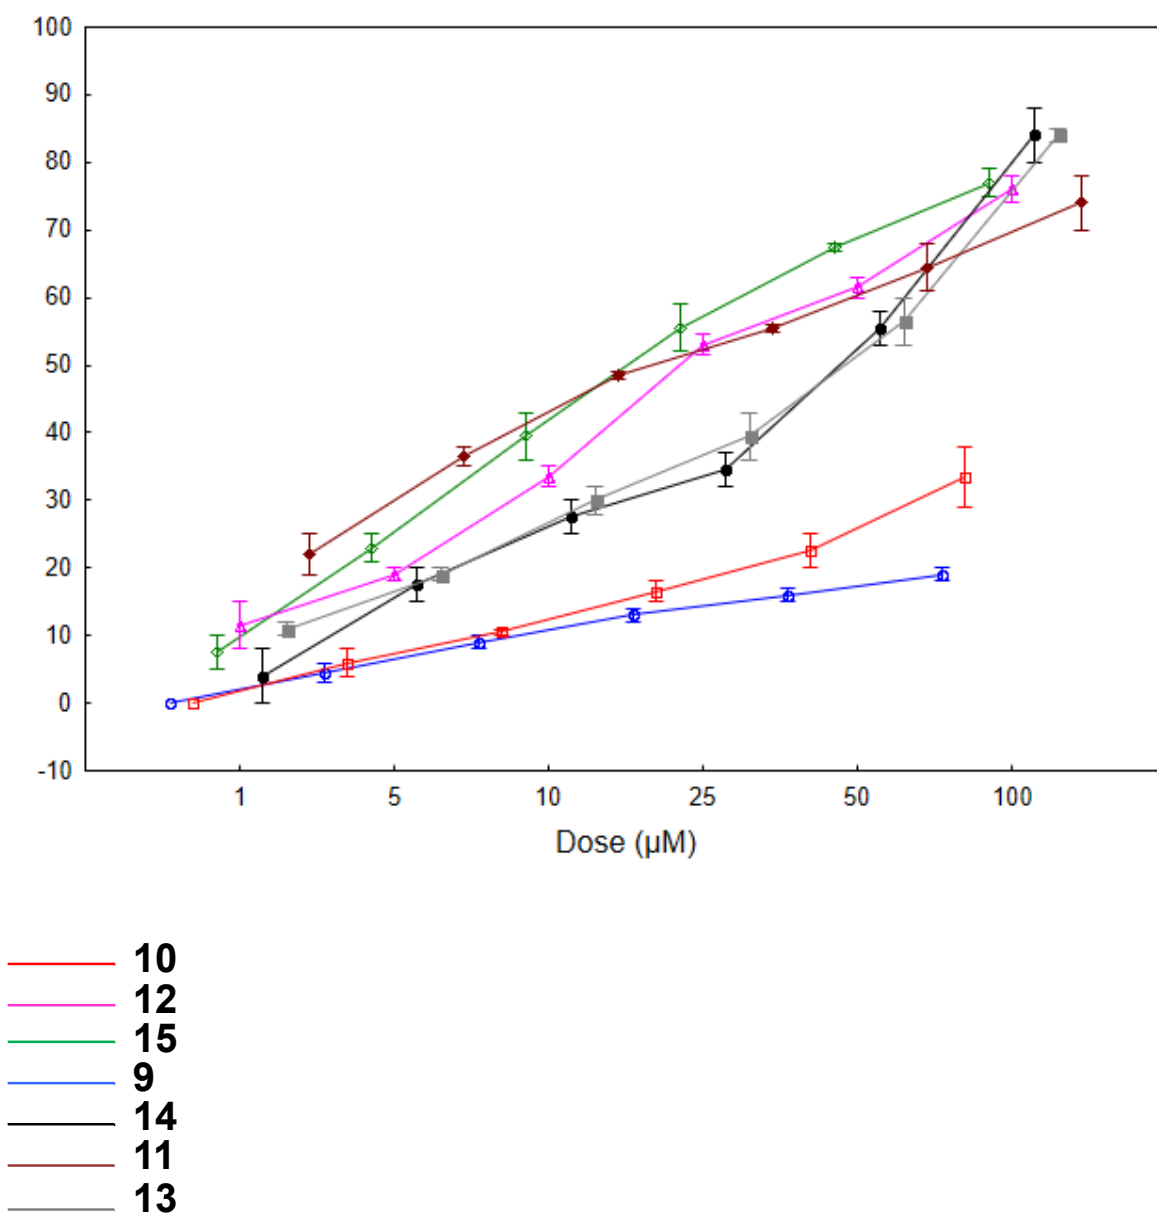

**Figure S4.** HL60R cells

Supplement: s1 [file s1]
